# Supplementary material
Source: Springer Nature journal article supplement (https://www.springermedizin.de/resource/supplementary/12883_2010_384_MOESM2_ESM.pdf/9455032)

**Medial view**

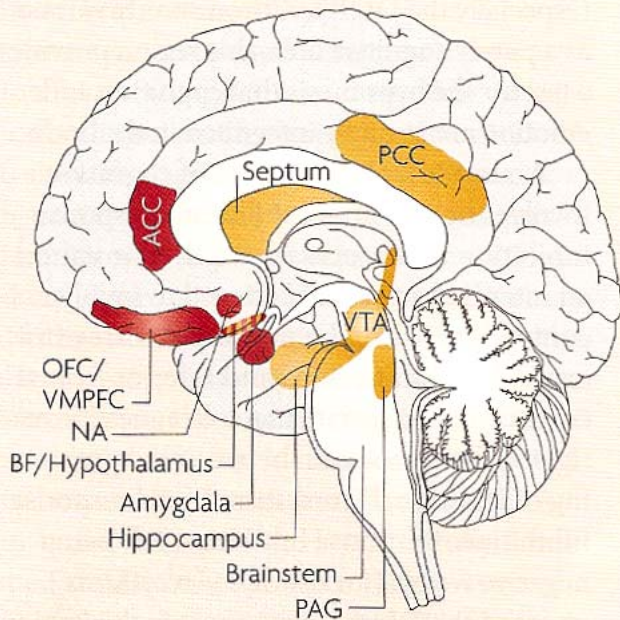

**Lateral view**

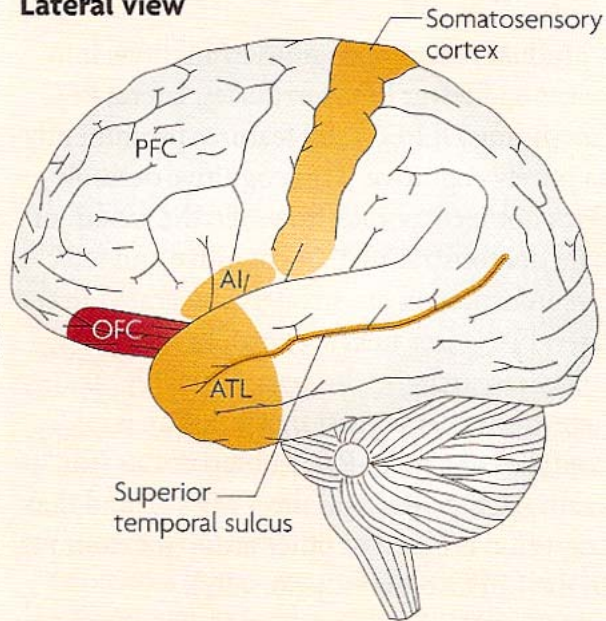

Supplement: MOESM2 [file 9455032]
